# Supplementary material for: High-efficiency, air stable graphene/Si micro-hole array Schottky junction solar cells
Source: Royal Society of Chemistry journal article supplement (doi:10.1039/c3ta13750c), 2013-01-01
Supplement: c3ta13750c.pdf [file c3ta13750c.pdf]

## Supporting information

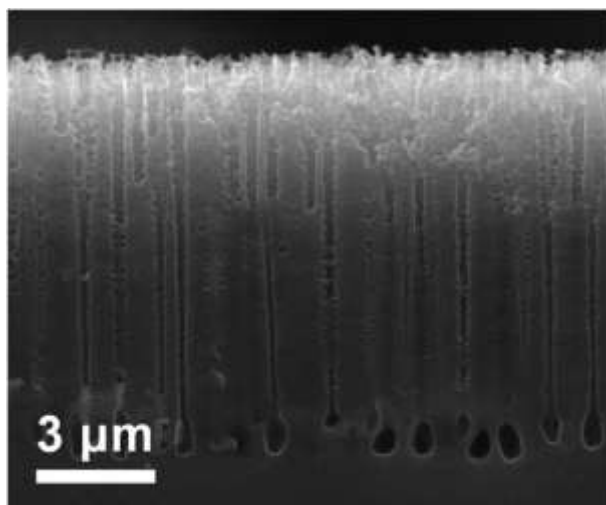

**Figure S1.** Typical cross-sectional view SEM image of the electrochemical-etched SiHA.

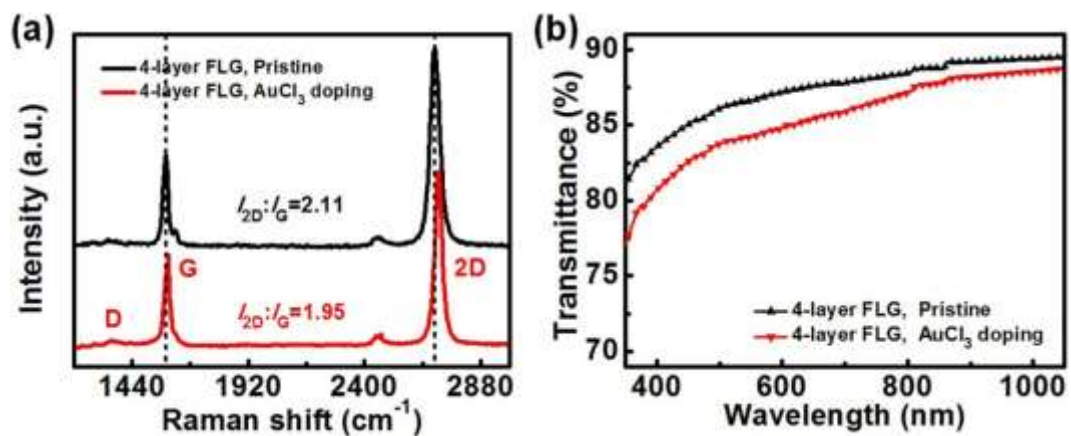

**Figure S2.** (a) Transmittance and (b) Raman spectra of 4-layer FLG before and after AuCl<sub>3</sub> doping.
